# Supplementary material for: Photocatalysis of nanocomposite titania–natural silica as antibacterial against Staphylococcus aureus and Pseudomonas aeruginosa
Source: Royal Society of Chemistry journal article supplement (doi:10.1039/d1ra07043f), 2021-01-01
Supplement: d1ra07043f1.pdf [file d1ra07043f1.pdf]

## Supplementary Data

Goodness of fit (GoF) is a statistical model describing how well the experimental results obtained with a series of observations. GoF value is calculated using equation (1).

$$\text{GoF} = \frac{R_{wp}}{(R_{exp})^2} \quad (1)$$

Where GoF is the match value,  $R_{wp}$  (weighted profile R-factor) is the simplest difference index and  $R_{exp}$  (expected R-factor) is the expected "best  $R_{wp}$ " quantity. The Rietveld refinement plot is depicted in Figures S1–S4.

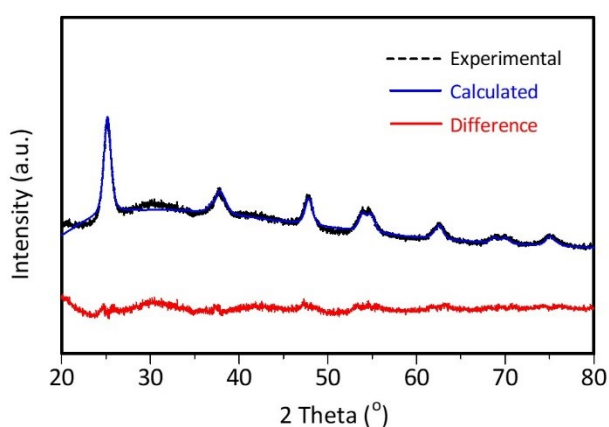

Figure S1. Rietveld refinement of XRD pattern of synthesized  $\text{TiO}_2$ .

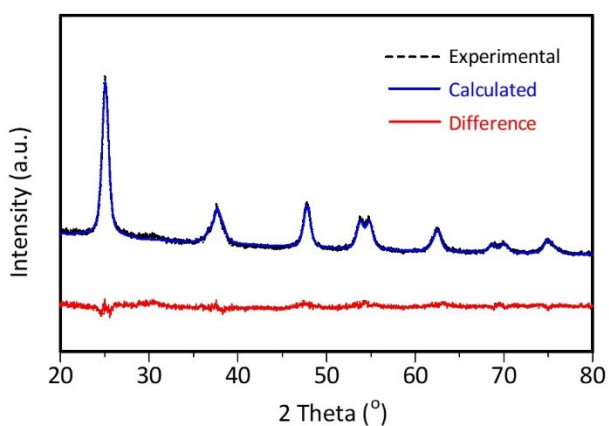

Figure S2. Rietveld refinement of XRD pattern of composite  $\text{TiO}_2\text{-SiO}_2$  1:0.5.

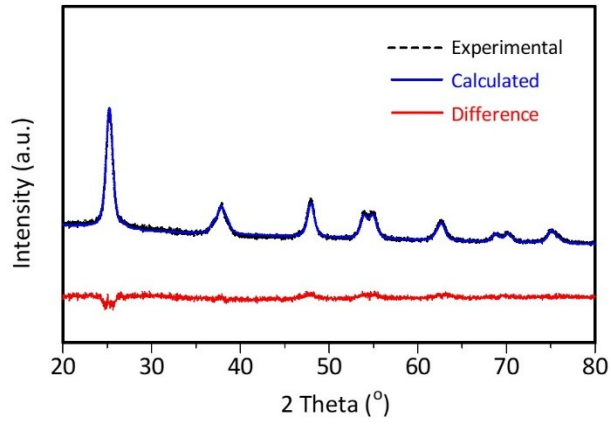

Figure S3. Rietveld refinement of XRD pattern of composite TiO<sub>2</sub>-SiO<sub>2</sub> 1:1.

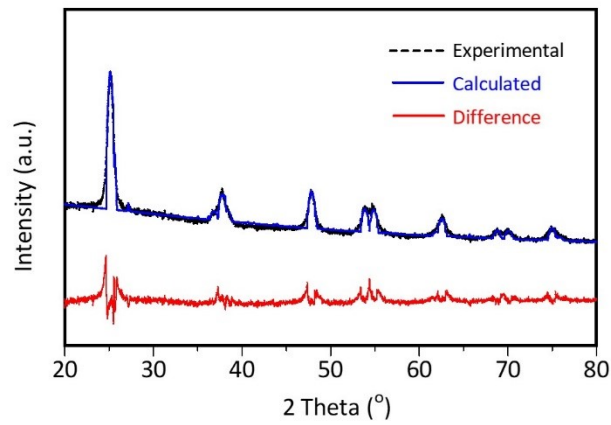

Figure S4. Rietveld refinement of XRD pattern of composite TiO<sub>2</sub>-SiO<sub>2</sub> 1:2.
